# Supplementary material
Source: ML conference proceedings conference paper supplement (https://proceedings.mlr.press/v129/yger20a.html)
Supplement: Supplementary file [file yger20a-supp.pdf]

# Geodesically-convex optimization for averaging partially observed covariance matrices - Supplementary material -

**Florian Yger\***

*LAMSADE, CNRS, Université Paris-Dauphine, Université PSL  
Paris, France*

FLORIAN.YGER@DAUPHINE.FR

**Sylvain Chevallier\***

*Université Paris-Saclay, UVSQ, LISV  
Vélizy-Villacoublay, France*

SYLVAIN.CHEVALLIER@UVSQ.FR

**Quentin Barthélemy**

*Foxstream  
Vauk-en-Velin, France*

Q.BARTHELEMY@FOXSTREAM.FR

**Suvrit Sra**

*Laboratory for Information and Decision Systems, Massachusetts Institute of Technology  
Cambridge, MA, USA*

SUVRIT@MIT.EDU

## Abstract

This file contains the supplementary material for the article “Geodesically-convex optimization for averaging partially observed covariance matrices” (Yger et al., 2020).

### 1. Detailed proof on geodesic convexity of Section 3.4

For SPD matrices  $\mathbb{I}_c \preccurlyeq \Sigma_1, \Sigma_2$ , we have  $\mathbb{I}_c \preccurlyeq (\Sigma_1 \sharp \Sigma_2)$ . We consider a full column-rank matrix  $\tilde{M} \in \mathbb{R}^{c \times (c-p)}$ , such that  $\tilde{M}^\top \tilde{M} \succcurlyeq \mathbb{I}_{(c-p)}$ . On the one hand, we have:

$$\mathbb{I}_{(c-p)} \preccurlyeq \tilde{M}^\top \tilde{M} = \tilde{M}^\top \mathbb{I}_c \tilde{M} \preccurlyeq \tilde{M}^\top (\Sigma_1 \sharp \Sigma_2) \tilde{M}, \quad (1)$$

On the other hand, applying Theorem 2.8 of (Sra and Hosseini, 2015) with  $\tilde{M}^\top (\cdot) \tilde{M}$  as a strictly positive map:

$$\tilde{M}^\top (\Sigma_1 \sharp \Sigma_2) \tilde{M} \preccurlyeq (\tilde{M}^\top \Sigma_1 \tilde{M}) \sharp (\tilde{M}^\top \Sigma_2 \tilde{M}). \quad (2)$$

Combining Eq. (1) and (2):

$$\mathbb{I}_{(c-p)} \preccurlyeq \tilde{M}^\top (\Sigma_1 \sharp \Sigma_2) \tilde{M} \preccurlyeq (\tilde{M}^\top \Sigma_1 \tilde{M}) \sharp (\tilde{M}^\top \Sigma_2 \tilde{M}), \quad (3)$$

and because  $\|\text{Log}(\cdot)\|_F^2 = \delta_R^2(\mathbb{I}, \cdot)$  is monotonically increasing above  $\mathbb{I}$ , we have:

$$\delta_R^2 \left( \mathbb{I}_{(c-p)}, \tilde{M}^\top (\Sigma_1 \sharp \Sigma_2) \tilde{M} \right) \leq \delta_R^2 \left( \mathbb{I}_{(c-p)}, (\tilde{M}^\top \Sigma_1 \tilde{M}) \sharp (\tilde{M}^\top \Sigma_2 \tilde{M}) \right). \quad (4)$$

Using continuity, this midpoint convexity is sufficient to prove the geodesic convexity.

## 2. Dataset visualisation of Section 4.1

Figure 1 illustrates the dataset generated in the experiment described in Section 4.1.

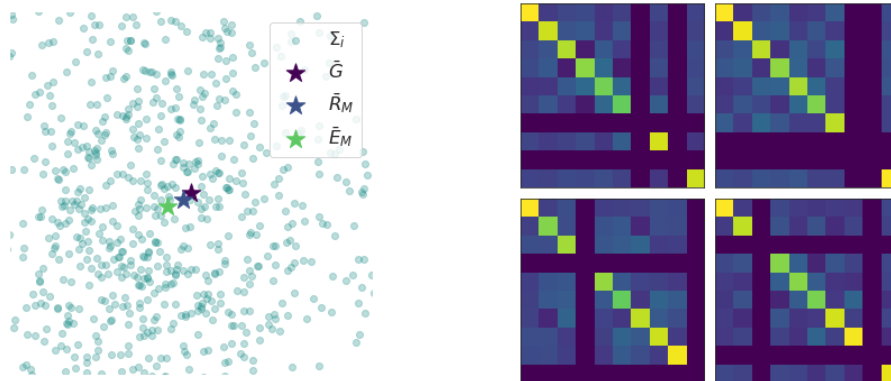

Figure 1: Left: visualization of the generated covariance matrices  $\Sigma_i$  (for  $\sigma = 0.25$ ), projected in the tangent space at  $\bar{G}$  and keeping the two highest principal components, with the groundtruth  $\bar{G}$ , the masked Riemannian mean  $\bar{R}_M$  and the masked Euclidean mean  $\bar{E}_M$ . Right: visualization of some incomplete covariance matrices, for  $p = 2$  missing variables.

## 3. Evaluation of convergence rate and robustness on synthetic dataset

The convergence rate is evaluated on a synthetic dataset: matrices are generated as in Section 4.1 of the article. The training samples are generated from a distribution that is defined by a reference  $\bar{G}$  and a dispersion  $\sigma$ . In this experiment, data are generated with  $m = 100$  matrices,  $c = 30$  variables, and  $p = 5$  missing variables. The robustness of the algorithm is evaluated, varying the noise  $\sigma = \{0.25, 0.5, 1.0\}$ . The solver used to estimate the masked Riemannian mean is a Riemannian conjugate gradient.

On the Fig. 2, the value of the cost  $f_{R_M}$  of the masked Riemannian mean (defined in Eq. (10)) is represented as a function of the iteration. The estimation of the masked mean  $\bar{\Sigma}$  is repeated 50 times, with different initial points. The cost values  $f_{R_M}$  are plotted as green (light gray) lines. The averaged cost per iteration is shown as a strong blue (dark) line.

The Fig. 2 shows that the algorithm converges after 3 to 4 iterations, depending of the dispersion  $\sigma$  of the generated matrices. This experimental validation confirms that the introduced algorithm converges in practice for different levels of noise, and could be applied on various types of data.

## References

S Sra and R Hosseini. Conic geometric optimization on the manifold of positive definite matrices. *SIAM J Optim*, 25(1):713–739, 2015.

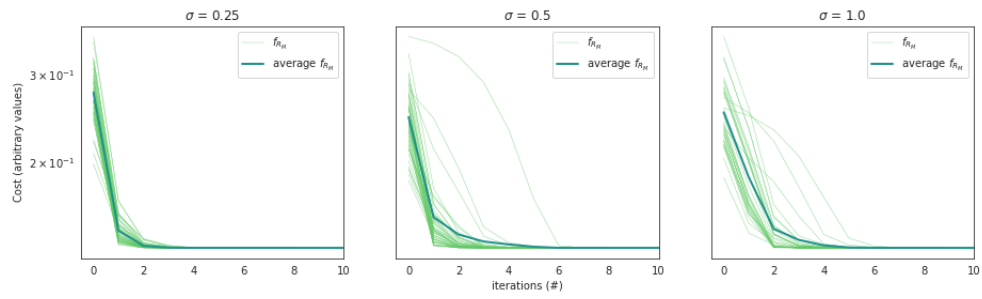

Figure 2: Evaluation of the convergence rate, for different  $\sigma$  values: cost  $f_{R_M}$  is represented as a function of the iteration.

F Yger, S Chevallier, Q Barthélemy, and S Sra. Geodesically-convex optimization for averaging partially observed covariance matrices. In *ACML*, pages 417–432, 2020.
